# Supplementary material for: Theoretical understanding of electronic and mechanical properties of 1T′ transition metal dichalcogenide crystals
Source: publisher site journal article supplement (doi:10.3762/bjnano.13.11), 2022-02-02
Supplement: Additional file 1 [file 2190-4286-13-11-S1.pdf]

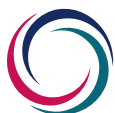

## Supporting Information

for

### **Theoretical understanding of electronic and mechanical properties of 1T' transition metal dichalcogenide crystals**

Seyedeh Alieh Kazemi, Sadegh Imani Yengejeh, Vei Wang, William Wen and Yun Wang

*Beilstein J. Nanotechnol.* **2022**, *13*, 160–171. [doi:10.3762/bjnano.13.11](https://doi.org/10.3762/bjnano.13.11)

### **The elastic constants, lattice constants, and fractional coordinates of 1T' MoS<sub>2</sub>, MoSe<sub>2</sub>, WS<sub>2</sub>, and WSe<sub>2</sub>**

**Table S1:** Elastic constants of 1T' TMDs.

| TMD                    | $C_{11}$<br>(GPa) | $C_{22}$<br>(GPa) | $C_{12}$<br>(GPa) | $C_{13}$<br>(GPa) | $C_{33}$<br>(GPa) | $C_{44}$<br>(GPa) | $C_{66}$<br>(GPa) |
|------------------------|-------------------|-------------------|-------------------|-------------------|-------------------|-------------------|-------------------|
| MoS <sub>2</sub> -1T'  | 184               | 184               | 34                | 26                | 30                | 17                | 72                |
| MoSe <sub>2</sub> -1T' | 140               | 140               | 48                | 18                | 28                | 12                | 63                |
| WS <sub>2</sub> -1T'   | 179               | 179               | 29                | 27                | 35                | 15                | 74                |
| WSe <sub>2</sub> -1T'  | 161               | 161               | 43                | 18                | 30                | 10                | 66                |

Lattice constants and the corresponding fractional coordinates of MoS<sub>2</sub>

**1T'**

|                     |                     |                      |
|---------------------|---------------------|----------------------|
| 6.3896450466670984  | 0.00000000000000008 | -0.00000000000000001 |
| -3.1948225233335488 | 5.7334302035443461  | -0.0046169662032723  |
| 0.00000000000000001 | -0.0025832378751777 | 5.8533210182003934   |

Mo S

4 8

Direct

|                    |                    |                    |
|--------------------|--------------------|--------------------|
| 0.0249100683464292 | 0.5498201366928583 | 0.9903531575298317 |
| 0.9750899316535708 | 0.9501798633071417 | 0.0096468424701683 |
| 0.5249100683464292 | 0.5498201366928583 | 0.9903531575298317 |
| 0.4750899316535708 | 0.9501798633071417 | 0.0096468424701683 |
| 0.3312301382877720 | 0.6624602766755601 | 0.7115900311713190 |
| 0.6687698617122280 | 0.8375397233244399 | 0.2884099688286810 |
| 0.8312301382877720 | 0.6624602766755601 | 0.7115900311713190 |
| 0.1687698617122280 | 0.8375397233244399 | 0.2884099688286810 |
| 0.1642746424836190 | 0.3285492848672362 | 0.2270530292419650 |
| 0.8357253575163810 | 0.1714507151327638 | 0.7729469707580350 |
| 0.6642746424836190 | 0.3285492848672362 | 0.2270530292419650 |
| 0.3357253575163810 | 0.1714507151327638 | 0.7729469707580350 |

Lattice vectors and the corresponding fractional coordinate of MoSe<sub>2</sub>

**1T'**

|                     |                     |                     |
|---------------------|---------------------|---------------------|
| 6.5355606848268772  | 0.0000000000000005  | -0.0000000000000001 |
| -3.2677803424134391 | 5.9605312743774821  | -0.0906926502774131 |
| 0.0000000000000001  | -0.0849343856189682 | 6.5006933161539138  |

Mo Se

4 8

Direct

|                    |                    |                    |
|--------------------|--------------------|--------------------|
| 0.0290750595021705 | 0.5581501190043200 | 0.9896230404994407 |
| 0.9709249404978295 | 0.9418498809956800 | 0.0103769595005595 |
| 0.5290750595021705 | 0.5581501190043200 | 0.9896230404994407 |
| 0.4709249404978293 | 0.9418498809956800 | 0.0103769595005595 |
| 0.3272601685119871 | 0.6545203371239902 | 0.7146140989348233 |
| 0.6727398314880129 | 0.8454796628760098 | 0.2853859010651766 |
| 0.8272601685119871 | 0.6545203371239902 | 0.7146140989348233 |
| 0.1727398314880129 | 0.8454796628760098 | 0.2853859010651766 |
| 0.1647887744037275 | 0.3295775487074461 | 0.2176471467585184 |
| 0.8352112255962725 | 0.1704224512925542 | 0.7823528532414888 |
| 0.6647887744037275 | 0.3295775487074461 | 0.2176471467585184 |
| 0.3352112255962728 | 0.1704224512925542 | 0.7823528532414888 |

Lattice vectors and the corresponding fractional coordinate of WS<sub>2</sub>

**1T'**

1.0000000000000000  
6.4504160368482530 0.00000000000000008 -0.00000000000000001  
-3.2252080184241261 5.7129809797774760 0.0036739357926529  
0.00000000000000001 0.0062438259686736 5.7724584614076333

W S  
4 8

Direct

0.0250259519529066 0.5500519039058204 0.9913466733250006  
0.9749740480470933 0.9499480960941796 0.0086533266749994  
0.5250259519529067 0.5500519039058204 0.9913466733250006  
0.4749740480470934 0.9499480960941796 0.0086533266749994  
0.3293408884560970 0.6586817770122171 0.7072539760472207  
0.6706591115439030 0.8413182229877829 0.2927460239527793  
0.8293408884560970 0.6586817770122171 0.7072539760472207  
0.1706591115439030 0.8413182229877829 0.2927460239527793  
0.1653080018332155 0.3306160035664292 0.2294794234771181  
0.8346919981667845 0.1693839964335707 0.7705205765228819  
0.6653080018332155 0.3306160035664292 0.2294794234771181  
0.3346919981667845 0.1693839964335707 0.7705205765228819

Lattice vectors and the corresponding fractional coordinate of WSe<sub>2</sub>

**1T'**

6.5713076526683087 0.0000000000000009 -0.0000000000000001  
-3.2856538263341535 5.9401005272150673 -0.0755272029720784  
0.0000000000000001 -0.0742183519869420 6.2779127348156480

W Se

4 8

Direct

0.0293193584847273 0.5586387169694547 0.9890611518402181  
0.9706806415152656 0.9413612830305453 0.0109388481597819  
0.5293193584847344 0.5586387169694547 0.9890611518402181  
0.4706806415152656 0.9413612830305453 0.0109388481597819  
0.3266491310919974 0.6532982622839967 0.7029118506403123  
0.6733508689080026 0.8467017377160033 0.2970881493596877  
0.8266491310919974 0.6532982622839967 0.7029118506403123  
0.1733508689080026 0.8467017377160033 0.2970881493596877  
0.1647839415961130 0.3295678830922171 0.2250558405099312  
0.8352160584038870 0.1704321169077829 0.7749441594900688  
0.6647839415961130 0.3295678830922171 0.2250558405099312  
0.3352160584038870 0.1704321169077829 0.7749441594900688
